# Supplementary material
Source: PubMed Central journal article supplement (PMC2586258)

## Supplementary information

### Figure legends

**Fig. S1. Final electron density map and the overall structure of the HNF4 $\alpha$ -DBD/DNA complex superimposed with other related NR-DBD/DNA complexes.** (A) A representative 2Fo-Fc map showing the protein-DNA interactions. The map was contoured at the  $1\sigma$  level. (B) Superposition of HNF4 $\alpha$ -DBD/DNA complex and the related nuclear receptors whose DNA complex crystal structures are available. Only monomeric structures are shown for clarity. PDB accession codes for the structures used in this figure are: HNF4 $\alpha$  (3CBB), RXR (1BY4), RAR (1DSZ), EcR (1R0N), VDR (1YNW), TR (2NLL), LRH1 (2A66), ER (1HCQ), ERR2 (1LO1), Rev-Erb (1HLZ), and PR (2C7A).

**Fig. S2. Superposition of the upstream and downstream HNF4 $\alpha$ -DBD monomers.** Notable differences are only seen at a solvent-exposed residue (M84) within the long linker between helix I and helix II due to different crystal contacts. Uneven DNA bending is also believed to result from different crystal packing environment.

Figure S1

(A)

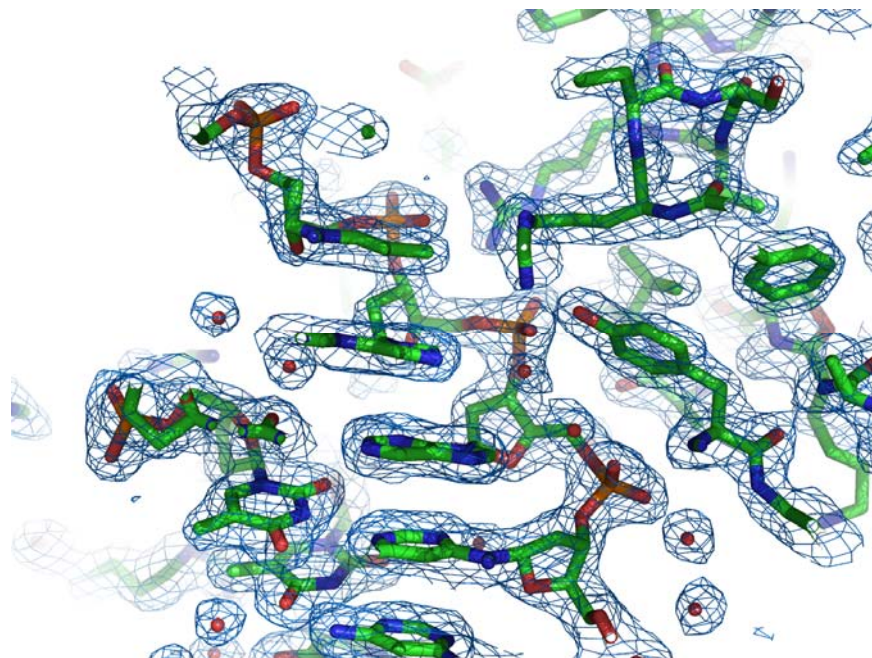

(B)

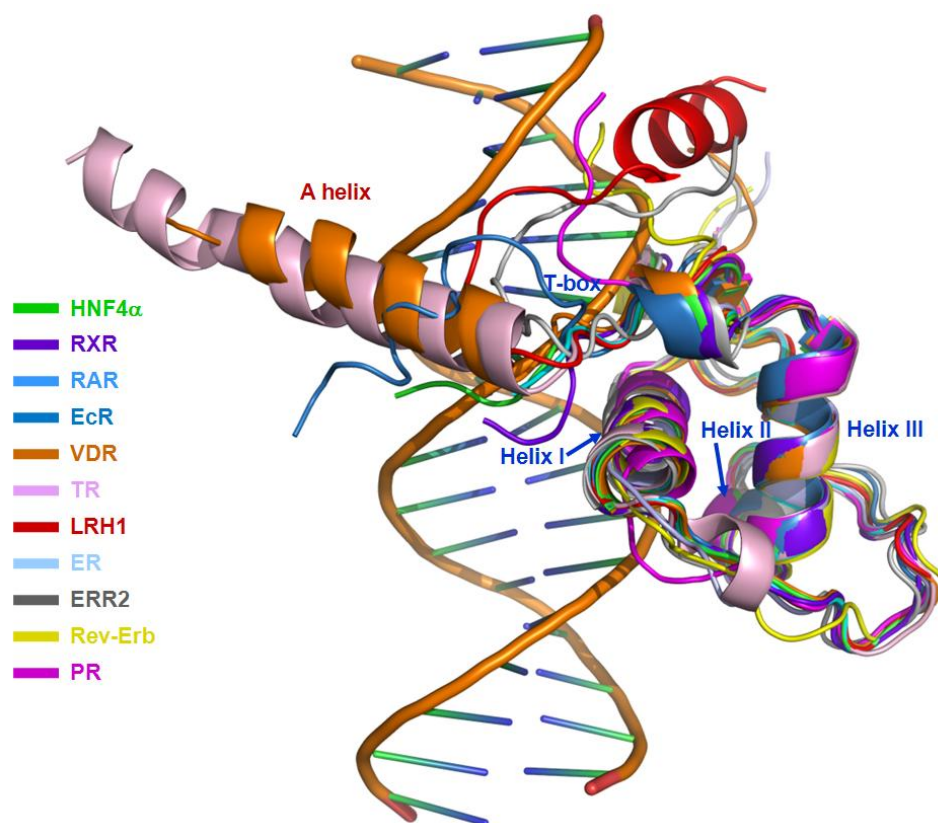

Figure S2

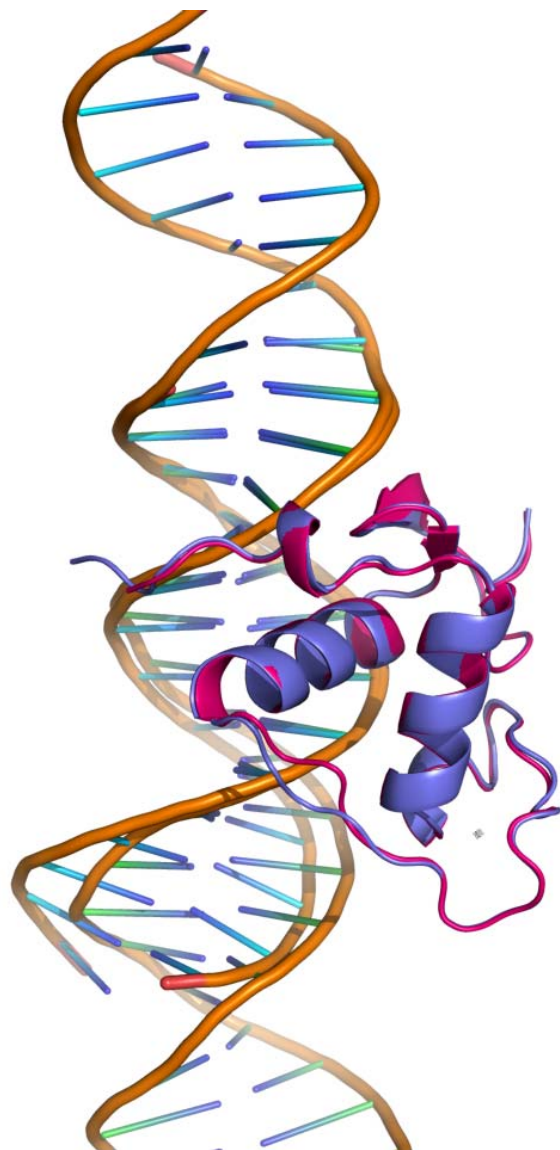

Supplement: M806213200_1.pdf [file M806213200_1.pdf]
